# Supplementary material for: Comparative Venomics of C. flavidus and C. frigidus and Closely Related Vermivorous Cone Snails
Source: MDPI journal article supplement (doi:10.3390/md20030209), 2022-03-15
Supplement: s1 [file s1]

**Table S2.** Integration of the transcriptome and proteomic data using ProteinPilot™ tool.

Underlined sequences are matched to 99% confidence to the MS/MS fragments obtained from reduced-alkylated and reduced-alkylated-trypsin digested extracted venom from *C. flavidus* (FLA), *C. frigidus* (FRI) collected from One Tree Island reef.

| Sequence ID    | Seq. Freq. | Mature Sequence                                                                                                                     | Cystein Mod. | FLA | FRI |
|----------------|------------|-------------------------------------------------------------------------------------------------------------------------------------|--------------|-----|-----|
| FLA_01_A       | 155        | <u>DCCNDPACAVNHQDLCT</u>                                                                                                            | Y            | ✓   | ✓   |
| FLA_05_A       | 4          | <u>DCCSSVACAHTPSC</u>                                                                                                               | Y            | ✓   | 0   |
| FLA_12_A       | 2          | <u>GCCSDPPCARHNPAC</u>                                                                                                              | Y            | ✓   | 0   |
| FLA_14_A       | 2          | <u>GCCSNPPCAHNPDC</u>                                                                                                               | Y            | ✓   | 0   |
| FLA_15_A*      | 8          | <u>GCCSNPPCAHLNPAC</u>                                                                                                              | Y            | ✓   | ✓   |
| FLA_17_A       | 336        | <u>GCCSNPPCALNNPDC</u>                                                                                                              | Y            | ✓   | 0   |
| FLA_22_B1      | 19         | AADENLEERRGHSNVDKSAFDSESDPGAFMKFLEDNGNK<br><u>LPFEEMD</u> GASPDLGNFEPSEAENDHEENKFRFFDQQP                                            | N            | ✓   | 0   |
| FLA_23_B2      | 12         | AADENLEERREHAKFQADKSAFDSESPEDFMKFLEENG<br><u>TNPFEDAS</u> PDLGKFESDQNGQEENKFSFFNQPP                                                 | N            | ✓   | 0   |
| FLA_24_B2      | 26         | AADENLEERREHAKFQADKSAFDSESPEDFMKFLEENG<br><u>TNPFEDAS</u> PDLGKFESDQNGQEENKFRFFNQPP                                                 | N            | ✓   | 0   |
| FLA_31_ConIns  | 3          | SIGTEQTCTPDEPADPQGRCPALSQYHERMCELEEIRHGG<br>TFDPQKKRGRASLLRKRRGFLSMLKARAKRNEAGSLQRAGR<br><u>GIVCECCQNH</u> CSDEEITEYCPPVTESSS       | Y            | ✓   | 0   |
| FLA_33_ConIns  | 3          | TCEPEDPPDPQGKCGPALSQYHERMCELEEIRHGGTFDPQ<br>KKRGRVSSLRKRRGFLSMLKARAKRNEAGSLQRAGRGII<br>CQNRCSDEEITEYCPPVTESSS                       | Y            | ✓   | 0   |
| FLA_34_ConIns* | 2          | TCEPEDPPDPQGRCPALSQYHERMCELEEIRHGGTFDPQ<br>KKRGRASPLRKRRGFLSMLKARAKRNEAGSLQRAGR<br><u>GIIICE</u><br><u>CCQNR</u> CSDEEITEYCPPVTESSS | Y            | ✓   | 0   |
| FLA_35_Conophy | 2          | SIEQCRYCSFGKCVWPIVCCGNSGCEIGTVEANTCRPEAGQ<br>PFPCRVIGKSCVMNNPSDPSNYYGHCIADADGRGICCVDDN<br>TCTAHSVCP                                 | Y            | ✓   | 0   |
| FLA_36_Conophy | 9          | STECWYCSFGKCVWPIICGDDGCEMGTAEANSRPEGDQ<br>HFPCRVIKSCIMNNPSNPSNYYGHCIADADGLGICCVDDD<br><u>TCTLHSGCP</u>                              | Y            | ✓   | 0   |
| FLA_37_Conophy | 2          | STECWYCSFGKCVWPIICGDDGCEMGTAEANTCRPEGDQ<br>HFPCRVIKSCIMNNPSNPSNYYGHCIADADGLGICCVDDD<br><u>TCTLHSGCP</u>                             | Y            | ✓   | 0   |
| FLA_38_Conophy | 3          | STEECWSCSFGKCVWPIVCCGDDGCEMGTAEDKCRPEG<br><u>GQSFP</u> CRVTGQYCFMNNPSNPNRYHGHCVGGDGTGICCV<br>DDNTCTSHSGCP                           | Y            | ✓   | 0   |
| FLA_39_Conophy | 5          | STEQCWYCSFGKCVWPIICGDDGCEMGTAEANSRPEGD<br>QRFPCRVIKSCIMNNPSNPDDHVGNCIGGDGLGICCVDD<br><u>NTCASHSGCL</u>                              | Y            | ✓   | 0   |
| FLA_51_I1      | 18         | <u>GTCSGIGQGCIHHLNCCWDMCCYGHTCVVNIIGCPPH</u>                                                                                        | Y            | ✓   | 0   |
| FLA_52_I1      | 8          | <u>GTCSGIGQGCIHHLSCCWDMCCYGHTCVVNIIGCPPH</u>                                                                                        | Y            | ✓   | 0   |
| FLA_53_I1*     | 25         | TCSDIGQGCTRHLNCCWDMCCYGHTCVMNIIIGCPPH                                                                                               | Y            | ✓   | ✓   |
| FLA_54_I1      | 136        | QFFCPDSENDPLNCIETKASDATCMKSNSDQTYSYVCGYCG<br>QKKESC <u>FGNKVP</u> SDYNCQTRKIVNNCGGSAL                                               | Y            | ✓   | 0   |
| FLA_59_I2      | 32         | <u>CSPSGAHCTKHIPCCNGSCCSGKCKHLCFVRF</u>                                                                                             | Y            | ✓   | 0   |
| FLA_60_I2      | 30         | <u>CSSSGSYCTKHIPCCNGSCCSGKCKHLCFVRF</u>                                                                                             | Y            | ✓   | 0   |
| FLA_61_I2      | 990        | <u>CIREDAPCSFSAHCCGRNCCRGYCERPCR</u> WIGKRTLQKSP<br>PTSLKCCTEVCCFSS                                                                 | Y            | ✓   | 0   |
| FLA_63_I2*     | 20         | <u>CTREDAPCSLPIQCCRRNCCRGTCCKHPCRTV</u>                                                                                             | Y            | ✓   | ✓   |
| FLA_65_I2*     | 8          | <u>CLSDGTVCRHHQQCHRS</u> CCFRTCLHPCRNT                                                                                              | Y            | ✓   | ✓   |

|                                     |         |                                                                                                                                                                                                                                                                                                                                                                                                                 |   |   |   |
|-------------------------------------|---------|-----------------------------------------------------------------------------------------------------------------------------------------------------------------------------------------------------------------------------------------------------------------------------------------------------------------------------------------------------------------------------------------------------------------|---|---|---|
| FLA_69_I2                           | 109     | CLHDGTPCRY <u>SFICCN</u> <u>GI</u> <u>CCHGR</u> CKYSCGWII                                                                                                                                                                                                                                                                                                                                                       | Y | ✓ | 0 |
| FLA_77_I2*                          | 203     | IPCHETGGWCSSVMWCCR <u>SSDV</u> <u>CCEL</u> <u>PGQAR</u> CTASVCSS<br>LT                                                                                                                                                                                                                                                                                                                                          | Y | ✓ | ✓ |
| FLA_79_I2                           | 9       | <u>TNV</u> <u>CLPDGM</u> RCRHYHQCCRRTCFFRCRYACATN                                                                                                                                                                                                                                                                                                                                                               | Y | ✓ | 0 |
| FLA_80_I2                           | 211     | <u>CYQDET</u> <u>PCR</u> <u>GSIF</u> <u>CCR</u> <u>KK</u> <u>CIGT</u> <u>CRFP</u> <u>CYV</u> KLERATFQELILQ<br>P                                                                                                                                                                                                                                                                                                 | Y | ✓ | 0 |
| FLA_94_M                            | 47      | <u>CCSRD</u> <u>CSV</u> <u>CIP</u> <u>CCPY</u> GSP                                                                                                                                                                                                                                                                                                                                                              | Y | ✓ | 0 |
| FLA_100_M                           | 2       | <u>QQV</u> <u>CCD</u> <u>PDV</u> <u>CD</u> <u>GG</u> <u>CY</u> <u>TC</u>                                                                                                                                                                                                                                                                                                                                        | Y | ✓ | 0 |
| FLA_107_NSF2*                       | 23      | <u>DCQW</u> <u>G</u> <u>CVG</u> <u>CR</u> <u>NR</u> <u>AG</u> <u>CC</u> <u>CG</u> <u>DQV</u> <u>C</u> <u>VD</u> <u>NN</u> <u>R</u> <u>C</u> <u>ES</u> <u>RS</u> <u>Q</u> <u>T</u> <u>T</u> <u>T</u> <u>R</u><br>PTQHL                                                                                                                                                                                           | x | ✓ | ✓ |
| FLA_112_bt01                        | 22      | EGAVNIFPCNPGR <u>CAC</u> <u>LP</u> <u>ME</u> <u>G</u> <u>T</u> <u>S</u> <u>Y</u> <u>Q</u> <u>C</u> <u>S</u> <u>I</u> <u>H</u> <u>S</u> <u>T</u> <u>A</u> <u>N</u> <u>C</u> <u>V</u> <u>G</u><br><u>NE</u> <u>C</u> <u>I</u> <u>T</u> <u>E</u> <u>S</u> <u>G</u> <u>W</u>                                                                                                                                        | Y | ✓ | 0 |
| FLA_113_bt01                        | 13      | EGAVNIFPCNPGR <u>CAC</u> <u>LP</u> <u>RE</u> <u>G</u> <u>T</u> <u>S</u> <u>Y</u> <u>Q</u> <u>C</u> <u>S</u> <u>I</u> <u>H</u> <u>T</u> <u>S</u> <u>T</u> <u>A</u> <u>N</u> <u>C</u> <u>V</u> <u>G</u> <u>N</u><br><u>E</u> <u>C</u> <u>I</u> <u>T</u> <u>E</u> <u>D</u> <u>E</u> <u>W</u>                                                                                                                       | Y | ✓ | 0 |
| FLA_120_O1                          | 2       | <u>DC</u> <u>GE</u> <u>Q</u> <u>G</u> <u>Q</u> <u>G</u> <u>CY</u> <u>TR</u> <u>P</u> <u>CC</u> <u>PN</u> <u>L</u> <u>M</u> <u>C</u> <u>R</u> <u>G</u> <u>G</u> <u>G</u> <u>T</u> <u>G</u> <u>G</u> <u>G</u> <u>V</u> <u>C</u> <u>Q</u> <u>P</u>                                                                                                                                                                 | Y | ✓ | 0 |
| FLA_122_O1                          | 400     | <u>DC</u> <u>GE</u> <u>Q</u> <u>G</u> <u>Q</u> <u>G</u> <u>CY</u> <u>TR</u> <u>P</u> <u>CC</u> <u>PN</u> <u>L</u> <u>V</u> <u>C</u> <u>R</u> <u>G</u> <u>G</u> <u>G</u> <u>T</u> <u>G</u> <u>G</u> <u>G</u> <u>V</u> <u>C</u> <u>Q</u> <u>P</u>                                                                                                                                                                 | Y | ✓ | 0 |
| FLA_123_O1*                         | 56      | DCGERGE <u>G</u> <u>CY</u> <u>TR</u> <u>P</u> <u>CC</u> <u>P</u> <u>G</u> <u>L</u> <u>E</u> <u>C</u> <u>H</u> <u>G</u> <u>T</u> <u>H</u> <u>A</u> <u>G</u> <u>G</u> <u>L</u> <u>C</u> <u>Q</u> <u>Y</u>                                                                                                                                                                                                         | Y | ✓ | ✓ |
| FLA_125_O1                          | 8       | DCGERGEGCYTRPCC <u>P</u> <u>G</u> <u>L</u> <u>E</u> <u>C</u> <u>I</u> <u>G</u> <u>S</u> <u>Y</u> <u>L</u> <u>G</u> <u>G</u> <u>V</u> <u>C</u> <u>Q</u> <u>W</u> <u>Q</u>                                                                                                                                                                                                                                        | Y | ✓ | 0 |
| FLA_128_O1                          | 7       | <u>DC</u> <u>GE</u> <u>R</u> <u>G</u> <u>Q</u> <u>G</u> <u>CY</u> <u>TR</u> <u>P</u> <u>CC</u> <u>P</u> <u>R</u> <u>Q</u> <u>C</u> <u>V</u> <u>G</u> <u>G</u> <u>A</u> <u>T</u> <u>G</u> <u>G</u> <u>G</u> <u>S</u> <u>C</u> <u>L</u>                                                                                                                                                                           | Y | ✓ | 0 |
| FLA_131_O1                          | 368     | <u>DC</u> <u>G</u> <u>N</u> <u>N</u> <u>G</u> <u>E</u> <u>G</u> <u>C</u> <u>H</u> <u>T</u> <u>R</u> <u>P</u> <u>C</u> <u>C</u> <u>T</u> <u>G</u> <u>L</u> <u>V</u> <u>C</u> <u>I</u> <u>T</u> <u>N</u> <u>Y</u> <u>D</u> <u>G</u> <u>R</u> <u>I</u> <u>C</u> <u>V</u> <u>W</u> <u>L</u>                                                                                                                         | Y | ✓ | 0 |
| FLA_135_O1                          | 3697    | <u>DC</u> <u>G</u> <u>N</u> <u>Q</u> <u>G</u> <u>E</u> <u>G</u> <u>CY</u> <u>TR</u> <u>P</u> <u>CC</u> <u>P</u> <u>G</u> <u>L</u> <u>E</u> <u>C</u> <u>I</u> <u>G</u> <u>T</u> <u>R</u> <u>A</u> <u>G</u> <u>G</u> <u>L</u> <u>C</u> <u>Q</u> <u>W</u>                                                                                                                                                          | Y | ✓ | 0 |
| FLA_136_O1                          | 989     | <u>DC</u> <u>G</u> <u>N</u> <u>Q</u> <u>G</u> <u>E</u> <u>G</u> <u>CY</u> <u>TR</u> <u>P</u> <u>CC</u> <u>P</u> <u>G</u> <u>L</u> <u>E</u> <u>C</u> <u>S</u> <u>G</u> <u>T</u> <u>Y</u> <u>A</u> <u>G</u> <u>G</u> <u>V</u> <u>C</u> <u>Q</u> <u>P</u>                                                                                                                                                          | Y | ✓ | 0 |
| FLA_137_O1                          | 5       | <u>DC</u> <u>G</u> <u>N</u> <u>Q</u> <u>G</u> <u>E</u> <u>G</u> <u>CY</u> <u>TR</u> <u>P</u> <u>CC</u> <u>P</u> <u>G</u> <u>L</u> <u>E</u> <u>C</u> <u>V</u> <u>G</u> <u>G</u> <u>R</u> <u>P</u> <u>G</u> <u>G</u> <u>L</u> <u>C</u> <u>Q</u> <u>Y</u>                                                                                                                                                          | Y | ✓ | 0 |
| FLA_138_O1                          | 707     | <u>DC</u> <u>G</u> <u>N</u> <u>Q</u> <u>G</u> <u>E</u> <u>G</u> <u>CY</u> <u>TR</u> <u>P</u> <u>CC</u> <u>S</u> <u>G</u> <u>L</u> <u>H</u> <u>C</u> <u>T</u> <u>G</u> <u>T</u> <u>H</u> <u>A</u> <u>G</u> <u>G</u> <u>L</u> <u>C</u> <u>Q</u> <u>W</u>                                                                                                                                                          | Y | ✓ | 0 |
| FLA_144_O1                          | 87      | <u>DC</u> <u>G</u> <u>Q</u> <u>Q</u> <u>G</u> <u>Q</u> <u>G</u> <u>CY</u> <u>TR</u> <u>P</u> <u>CC</u> <u>PN</u> <u>L</u> <u>V</u> <u>C</u> <u>R</u> <u>G</u> <u>G</u> <u>G</u> <u>T</u> <u>G</u> <u>G</u> <u>G</u> <u>S</u> <u>C</u> <u>Q</u> <u>P</u>                                                                                                                                                         | Y | ✓ | 0 |
| FLA_148_O1                          | 7       | <u>F</u> <u>P</u> <u>F</u> <u>G</u> <u>G</u> <u>F</u> <u>C</u> <u>A</u> <u>L</u> <u>E</u> <u>G</u> <u>E</u> <u>N</u> <u>C</u> <u>R</u> <u>I</u> <u>R</u> <u>P</u> <u>C</u> <u>C</u> <u>R</u> <u>L</u> <u>S</u> <u>C</u> <u>S</u> <u>D</u> <u>N</u> <u>T</u> <u>G</u> <u>F</u> <u>E</u> <u>C</u> <u>H</u>                                                                                                        | Y | ✓ | 0 |
| FLA_149_O1                          | 32      | <u>F</u> <u>P</u> <u>V</u> <u>G</u> <u>G</u> <u>F</u> <u>C</u> <u>A</u> <u>L</u> <u>E</u> <u>G</u> <u>E</u> <u>N</u> <u>C</u> <u>R</u> <u>I</u> <u>R</u> <u>P</u> <u>C</u> <u>C</u> <u>P</u> <u>G</u> <u>L</u> <u>S</u> <u>C</u> <u>S</u> <u>D</u> <u>N</u> <u>T</u> <u>G</u> <u>F</u> <u>E</u> <u>C</u> <u>H</u>                                                                                               | Y | ✓ | 0 |
| FLA_150_O1                          | 25      | <u>F</u> <u>P</u> <u>V</u> <u>G</u> <u>G</u> <u>F</u> <u>C</u> <u>G</u> <u>L</u> <u>E</u> <u>G</u> <u>E</u> <u>N</u> <u>C</u> <u>R</u> <u>I</u> <u>R</u> <u>P</u> <u>C</u> <u>C</u> <u>A</u> <u>G</u> <u>L</u> <u>S</u> <u>C</u> <u>S</u> <u>D</u> <u>N</u> <u>T</u> <u>G</u> <u>G</u> <u>E</u> <u>C</u> <u>H</u>                                                                                               | Y | ✓ | 0 |
| FLA_151_O1                          | 26      | <u>I</u> <u>P</u> <u>I</u> <u>G</u> <u>G</u> <u>F</u> <u>C</u> <u>A</u> <u>L</u> <u>E</u> <u>G</u> <u>E</u> <u>N</u> <u>C</u> <u>R</u> <u>I</u> <u>R</u> <u>P</u> <u>C</u> <u>C</u> <u>P</u> <u>G</u> <u>L</u> <u>S</u> <u>C</u> <u>S</u> <u>D</u> <u>N</u> <u>T</u> <u>G</u> <u>F</u> <u>E</u> <u>C</u> <u>H</u>                                                                                               | Y | ✓ | 0 |
| FLA_152_O1                          | 26      | <u>I</u> <u>P</u> <u>I</u> <u>P</u> <u>M</u> <u>F</u> <u>C</u> <u>A</u> <u>L</u> <u>E</u> <u>G</u> <u>E</u> <u>N</u> <u>C</u> <u>L</u> <u>I</u> <u>R</u> <u>P</u> <u>C</u> <u>C</u> <u>H</u> <u>G</u> <u>L</u> <u>S</u> <u>C</u> <u>S</u> <u>D</u> <u>N</u> <u>T</u> <u>G</u> <u>F</u> <u>E</u> <u>C</u> <u>H</u>                                                                                               | Y | ✓ | 0 |
| FLA_157_O1                          | 118     | <u>R</u> <u>G</u> <u>L</u> <u>E</u> <u>M</u> <u>F</u> <u>D</u> <u>V</u> <u>A</u> <u>E</u> <u>M</u> <u>C</u> <u>T</u> <u>T</u> <u>R</u> <u>G</u> <u>E</u> <u>T</u> <u>C</u> <u>F</u> <u>I</u> <u>I</u> <u>G</u> <u>C</u> <u>C</u> <u>S</u> <u>G</u> <u>L</u> <u>R</u> <u>C</u> <u>G</u> <u>G</u> <u>G</u> <u>T</u> <u>P</u> <u>W</u> <u>G</u> <u>N</u> <u>T</u> <u>C</u><br>QP                                   | Y | ✓ | 0 |
| FLA_159_O1                          | 30      | <u>R</u> <u>G</u> <u>L</u> <u>E</u> <u>M</u> <u>F</u> <u>N</u> <u>V</u> <u>D</u> <u>K</u> <u>L</u> <u>C</u> <u>A</u> <u>A</u> <u>N</u> <u>G</u> <u>Q</u> <u>T</u> <u>C</u> <u>F</u> <u>I</u> <u>R</u> <u>C</u> <u>C</u> <u>S</u> <u>G</u> <u>L</u> <u>T</u> <u>C</u> <u>G</u> <u>G</u> <u>G</u> <u>T</u> <u>T</u> <u>W</u> <u>G</u> <u>T</u> <u>K</u><br><u>K</u> <u>P</u>                                      | Y | ✓ | 0 |
| FLA_177_O3                          | 405     | AVDEECKEYCEQQKNCCGKTNGEPV <u>CA</u> <u>Q</u> <u>T</u> <u>C</u> <u>L</u>                                                                                                                                                                                                                                                                                                                                         | Y | ✓ | 0 |
| FLA_180_O3                          | 58      | <u>T</u> <u>A</u> <u>D</u> <u>E</u> <u>A</u> <u>C</u> <u>K</u> <u>E</u> <u>Y</u> <u>C</u> <u>E</u> <u>E</u> <u>R</u> <u>N</u> <u>K</u> <u>N</u> <u>C</u> <u>C</u> <u>G</u> <u>R</u> <u>T</u> <u>N</u> <u>G</u> <u>E</u> <u>P</u> <u>V</u> <u>C</u> <u>A</u> <u>Q</u> <u>L</u> <u>C</u> <u>F</u>                                                                                                                 | Y | ✓ | 0 |
| FLA_187_O3                          | 19      | TTEECKEYCEQQKN <u>N</u> <u>C</u> <u>C</u> <u>G</u> <u>L</u> <u>T</u> <u>N</u> <u>G</u> <u>E</u> <u>P</u> <u>R</u> <u>C</u> <u>A</u> <u>S</u> <u>M</u> <u>C</u> <u>V</u>                                                                                                                                                                                                                                         | Y | ✓ | 0 |
| FLA_188_O3                          | 56      | TTEECNEYCEQQKN <u>N</u> <u>C</u> <u>C</u> <u>G</u> <u>L</u> <u>T</u> <u>N</u> <u>G</u> <u>E</u> <u>P</u> <u>R</u> <u>C</u> <u>A</u> <u>S</u> <u>M</u> <u>C</u> <u>L</u>                                                                                                                                                                                                                                         | Y | ✓ | 0 |
| FLA_190_P*                          | 2       | <u>Y</u> <u>S</u> <u>C</u> <u>A</u> <u>R</u> <u>P</u> <u>C</u> <u>D</u> <u>Y</u> <u>H</u> <u>N</u> <u>D</u> <u>C</u> <u>P</u> <u>T</u> <u>S</u> <u>C</u> <u>P</u> <u>Y</u> <u>C</u> <u>T</u> <u>P</u> <u>F</u> <u>Q</u> <u>R</u> <u>C</u> <u>M</u>                                                                                                                                                              | Y | ✓ | ✓ |
| FLA_191_P*                          | 9       | <u>Y</u> <u>S</u> <u>C</u> <u>A</u> <u>R</u> <u>P</u> <u>C</u> <u>G</u> <u>Y</u> <u>H</u> <u>N</u> <u>D</u> <u>C</u> <u>P</u> <u>T</u> <u>S</u> <u>C</u> <u>P</u> <u>Y</u> <u>C</u> <u>T</u> <u>P</u> <u>F</u> <u>Q</u> <u>R</u> <u>C</u> <u>M</u>                                                                                                                                                              | Y | ✓ | ✓ |
| FLA_198_T*                          | 8       | <u>H</u> <u>C</u> <u>C</u> <u>P</u> <u>I</u> <u>D</u> <u>L</u> <u>P</u> <u>C</u> <u>C</u> <u>P</u> <u>I</u>                                                                                                                                                                                                                                                                                                     | Y | ✓ | ✓ |
| FLA_199_T                           | 139     | <u>H</u> <u>C</u> <u>C</u> <u>P</u> <u>I</u> <u>D</u> <u>L</u> <u>P</u> <u>C</u> <u>C</u> <u>P</u> <u>L</u>                                                                                                                                                                                                                                                                                                     | Y | ✓ | 0 |
| FLA_203_V                           | 4       | <u>R</u> <u>D</u> <u>C</u> <u>T</u> <u>T</u> <u>C</u> <u>G</u> <u>G</u> <u>E</u> <u>E</u> <u>C</u> <u>G</u> <u>R</u> <u>C</u> <u>T</u> <u>C</u> <u>T</u> <u>W</u> <u>G</u> <u>D</u> <u>N</u> <u>C</u> <u>D</u> <u>C</u> <u>V</u> <u>A</u> <u>W</u>                                                                                                                                                              | Y | ✓ | 0 |
| FLA_02_A / FRI_01_A^*               | 43/31   | <u>D</u> <u>C</u> <u>C</u> <u>N</u> <u>D</u> <u>P</u> <u>A</u> <u>C</u> <u>A</u> <u>V</u> <u>N</u> <u>N</u> <u>P</u> <u>G</u> <u>L</u> <u>C</u> <u>T</u>                                                                                                                                                                                                                                                        | Y | ✓ | ✓ |
| FLA_07_A / FRI_14_A*                | 575/208 | <u>G</u> <u>C</u> <u>C</u> <u>S</u> <u>D</u> <u>P</u> <u>P</u> <u>C</u> <u>A</u> <u>H</u> <u>H</u> <u>N</u> <u>P</u> <u>A</u> <u>C</u>                                                                                                                                                                                                                                                                          | Y | 0 | ✓ |
| FLA_08_A / FRI_09_A^*               | 462/4   | <u>G</u> <u>C</u> <u>C</u> <u>S</u> <u>D</u> <u>P</u> <u>P</u> <u>C</u> <u>A</u> <u>H</u> <u>K</u> <u>H</u> <u>C</u>                                                                                                                                                                                                                                                                                            | Y | ✓ | ✓ |
| FLA_09_A / FRI_07_A*                | 104/66  | <u>G</u> <u>C</u> <u>C</u> <u>S</u> <u>D</u> <u>P</u> <u>P</u> <u>C</u> <u>A</u> <u>H</u> <u>K</u> <u>Y</u> <u>C</u>                                                                                                                                                                                                                                                                                            | Y | 0 | ✓ |
| FLA_11_A / FRI_05_A^*               | 402/72  | <u>G</u> <u>C</u> <u>C</u> <u>S</u> <u>D</u> <u>P</u> <u>P</u> <u>C</u> <u>A</u> <u>H</u> <u>N</u> <u>N</u> <u>P</u> <u>D</u> <u>C</u>                                                                                                                                                                                                                                                                          | Y | ✓ | ✓ |
| FLA_16_A / FRI_12_A*                | 240/11  | <u>G</u> <u>C</u> <u>C</u> <u>S</u> <u>N</u> <u>P</u> <u>P</u> <u>C</u> <u>A</u> <u>H</u> <u>N</u> <u>N</u> <u>P</u> <u>D</u> <u>C</u>                                                                                                                                                                                                                                                                          | Y | 0 | ✓ |
| FLA_19_A / FRI_06_A^                | 104/70  | <u>D</u> <u>C</u> <u>C</u> <u>S</u> <u>D</u> <u>P</u> <u>P</u> <u>C</u> <u>A</u> <u>H</u> <u>N</u> <u>N</u> <u>P</u> <u>D</u> <u>C</u>                                                                                                                                                                                                                                                                          | Y | ✓ | 0 |
| FLA_40_Conophy /<br>FRI_21_Conophy* | 4/15    | STEQCWYCSFGKCVWPIVCCGSGGCQIGTAEANTCRPPAG<br>ERFPCKVIGK <u>S</u> <u>C</u> <u>V</u> <u>M</u> <u>N</u> <u>N</u> <u>P</u> <u>S</u> <u>D</u> <u>P</u> <u>S</u> <u>N</u> <u>Y</u> <u>G</u> <u>H</u> <u>C</u> <u>I</u> <u>G</u> <u>A</u> <u>E</u> <u>G</u> <u>H</u> <u>V</u> <u>C</u> <u>C</u> <u>V</u> <u>D</u><br><u>D</u> <u>N</u> <u>T</u> <u>C</u> <u>T</u> <u>A</u> <u>H</u> <u>S</u> <u>V</u> <u>C</u> <u>P</u> | Y | 0 | ✓ |

|                                     |               |                                                                                                      |   |   |   |
|-------------------------------------|---------------|------------------------------------------------------------------------------------------------------|---|---|---|
| FLA_41_Conophy /<br>FRI_22_Conophy* | 11/21         | STEQCWYCSFGKCVWPIVCCSGGGCQIGTAEANTCRPQAG<br>ERFPCKVMGKSCVMNNPSDPSNYYGHCI GAEGYGVCCVD<br>DNTCTAHSVCP  | Y | 0 | ✓ |
| FLA_55_I1 / FRI_28_I1*              | 148/70        | QFFCPDSENDPLNCVETKPTAATCMHSRSDKTYSYVCGYC<br>GQKKESC FGNKVPVSDYSCQSRKIVNNCGGSAL                       | Y | 0 | ✓ |
| FLA_57_I1 / FRI_31_I1*              | 66/4          | QFFCPDSENDPLNCVETKPTSATCMHSRSDKTYSYVCGYC<br>GQKKESC FGNKVPVSDYSCQSRKIVNNCGGSAL                       | Y | 0 | ✓ |
| FLA_64_I2 / FRI_41_I2*              | 11/21         | CISEDAPCSVNSQCCEGSCCDATCSNPCRWW                                                                      | Y | 0 | ✓ |
| FLA_66_I2 / FRI_40_I2^              | 100/3         | CLSDGTVCRHHRQCCHRSNRTCLHPCRNT                                                                        | Y | ✓ | 0 |
| FLA_73_I2 / FRI_32_I2*              | 14/31         | CRPDQSSCRGHHSCCSGNCCYKFFSGTCRPNACGIIIE                                                               | Y | 0 | ✓ |
| FLA_93_M / FRI_53_M^                | 85/40         | CCSQDCWVCIPCCPNGSP                                                                                   | Y | ✓ | 0 |
| FLA_117_O1 /<br>FRI_74_O1*          | 4/17          | DCAGQGESCFTRPCCSGLQCTGPRPLGVCCQ                                                                      | Y | 0 | ✓ |
| FLA_127_O1 / FRI_59_O1^             | 7076/11<br>02 | DCGERGEGCYTRPCCPGLEC VGGRPGGLCQY                                                                     | Y | ✓ | 0 |
| FLA_126_O1 /<br>FRI_67_O1^*         | 93/44         | DCGERGEGCYTRPCCPGLEC RGTHAGGLCQY                                                                     | Y | ✓ | ✓ |
| FLA_133_O1 / FRI_62_O1*             | 330/154       | DCGNQGEGRTRRCCPGLECIGGYPGGVCQW                                                                       | Y | 0 | ✓ |
| FLA_140_O1 / FRI_66_O1*             | 2962/76       | DCGNRGEGCYTRPCCPGLEC RGTHAGGLCQW                                                                     | Y | 0 | ✓ |
| FLA_147_O1 / FRI_72_O1^             | 21/166        | ECGEQGQGCYTRPCCPGQECVAGATGGGVCL                                                                      | Y | ✓ | 0 |
| FLA_153_O1 /<br>FRI_78_O1^*         | 2009/31       | IPVGGFCALEGENCRIRCCPDLS_CSDNTGFEC_H                                                                  | Y | ✓ | ✓ |
| FLA_154_O1 /<br>FRI_79_O1^*         | 781/27        | IPVGGFCALEGENCRIRCCPGLS_CSDNTGFEC_H                                                                  | Y | ✓ | ✓ |
| FLA_163_O2 / FRI_95_O2*             | 36/15         | KSTAQKWWDGEC PGSSNGCRSPWDCCAGDCAEGYCVL<br>R                                                          | Y | 0 | ✓ |
| FLA_183_O3 / FRI_97_O3*             | 35/19         | TTDEECEYCEQRNKDCCGLTNGEPRCASMCF                                                                      | Y | 0 | ✓ |
| FLA_185_O3 /<br>FRI_101_O3^*        | 129/19        | TTEECEYCEQRNKDCCGLTNGEPRCASMCF                                                                       | Y | ✓ | ✓ |
| FLA_196_T / FRI_104_T*              | 114/2         | GCCPDIAMCCVGI*                                                                                       | Y | 0 | ✓ |
| FLA_197_T / FRI_103_T^*             | 18/39         | SCCPDIAMCCVGI                                                                                        | Y | ✓ | ✓ |
| FLA_201_V / FRI_108_V*              | 16/22         | DECVTCDGEECCGRCTCVWGD CDCVDW                                                                         | Y | 0 | ✓ |
| FRI_02_A                            | 11            | DCCNLPAACAASNPGLCT                                                                                   | Y | 0 | ✓ |
| FRI_03_A^                           | 3             | DCCNDPACTVNNPGLCT                                                                                    | Y | ✓ | ✓ |
| FRI_04_A                            | 87            | DCCSSAACAHHTPSC                                                                                      | Y | 0 | ✓ |
| FRI_08_A                            | 21            | GCCSDPPCAHHNPSC                                                                                      | Y | 0 | ✓ |
| FRI_11_A                            | 17            | GCCSNPPCAHHNPDC                                                                                      | Y | 0 | ✓ |
| FRI_13_A                            | 3             | GCCSDPPCAHHNPDC                                                                                      | Y | 0 | ✓ |
| FRI_5_A                             | 8             | GCCSNPPCAHHNPAC                                                                                      | Y | 0 | ✓ |
| FRI_17_B1                           | 5             | AGHGGAAATDVRSADNTLKRLLHDFRRALKRRSDSRYDRKR<br>SISVNLDEILAETVRGSQEDSREASVAGSLEMLEEAGR                  | N | 0 | ✓ |
| FRI_20_Conophy                      | 17            | STEQCWYCSFGKCVWPIVCCSGGGCQIGTAEANTCRPQAG<br>ERFPCKVIGKSCVMNNPSDPSNYYGHCI GAEGHGVCCVDD<br>NTCTAHSVCP  | Y | 0 | ✓ |
| FRI_23_Conophy                      | 4             | STEQCWYCSFGKCVWPIVCCSGGGCQIGTPEANTCRPQA<br>GQHFPCKVIGKSCVMNNPSDPSNYYGRCI GAEGHGICCVDD<br>DNTCTAHSVCP | Y | 0 | ✓ |
| FRI_33_I2                           | 40            | CLSDGTVCRHHQQCHRSNRTCLHPCR_LGTRATFQEFIL<br>H                                                         | Y | 0 | ✓ |
| FRI_39_I2                           | 4             | CFPEGNRCRRNFHCCRENCRCRGFCQHPCGIA                                                                     | Y | 0 | ✓ |
| FRI_42_M                            | 45            | YCPRPVC                                                                                              | Y | 0 | ✓ |
| FRI_63_O1                           | 145           | DCGNQGEGRTRPCCPGLEC HGTHAGGLCQW                                                                      | Y | 0 | ✓ |
| FRI_68_O1                           | 31            | NCGNIGEGCYTRRCCPGLECIGGYPGGVCQW                                                                      | Y | 0 | ✓ |

|            |    |                                                                                                                                                                                                                                                                                                                                                                                              |   |   |   |
|------------|----|----------------------------------------------------------------------------------------------------------------------------------------------------------------------------------------------------------------------------------------------------------------------------------------------------------------------------------------------------------------------------------------------|---|---|---|
| FRI_76_O1^ | 5  | <b>A</b> <u>C</u> <b>G</b> <b>K</b> <b>E</b> <b>G</b> <b>E</b> <b>R</b> <b>C</b> <b>L</b> <b>I</b> <b>R</b> <b>P</b> <b>C</b> <b>C</b> <b>T</b> <b>G</b> <b>L</b> <b>T</b> <b>C</b> <b>S</b> <b>G</b> <b>I</b> <b>G</b> <b>G</b> <b>K</b> <b>C</b> <b>E</b> <b>S</b>                                                                                                                         | Y | ✓ | ✓ |
| FRI_77_O1  | 41 | <b>I</b> <b>P</b> <b>V</b> <b>G</b> <b>G</b> <b>F</b> <b>C</b> <b>A</b> <b>L</b> <b>E</b> <b>G</b> <b>Q</b> <b>N</b> <b>C</b> <b>R</b> <b>I</b> <b>R</b> <b>P</b> <b>C</b> <b>C</b> <b>P</b> <b>G</b> <b>L</b> <b>S</b> <b>C</b> <b>S</b> <b>D</b> <b>N</b> <b>T</b> <b>G</b> <b>F</b> <b>E</b> <b>C</b> <b>H</b>                                                                            | Y | 0 | ✓ |
| FRI_80_O1  | 3  | <b>I</b> <b>P</b> <b>V</b> <b>G</b> <b>G</b> <b>D</b> <b>C</b> <b>A</b> <b>G</b> <b>Q</b> <b>G</b> <b>E</b> <b>S</b> <b>C</b> <b>F</b> <b>K</b> <b>R</b> <b>P</b> <b>C</b> <b>C</b> <b>S</b> <b>G</b> <b>L</b> <b>Q</b> <b>C</b> <b>T</b> <b>G</b> <b>P</b> <b>R</b> <b>P</b> <b>L</b> <b>G</b> <b>V</b> <b>C</b> <b>Q</b>                                                                   | Y | 0 | ✓ |
| FRI_81_O1  | 3  | <b>L</b> <b>I</b> <b>F</b> <b>G</b> <b>G</b> <b>W</b> <b>C</b> <b>G</b> <b>T</b> <b>E</b> <b>G</b> <b>E</b> <b>S</b> <b>C</b> <b>K</b> <b>I</b> <b>L</b> <b>P</b> <b>C</b> <b>C</b> <b>S</b> <b>D</b> <b>L</b> <b>T</b> <b>C</b> <b>S</b> <b>G</b> <b>I</b> <b>F</b> <b>E</b> <b>G</b> <b>I</b> <b>C</b> <b>Q</b> <b>S</b>                                                                   | Y | 0 | ✓ |
| FRI_82_O1  | 2  | <b>D</b> <b>G</b> <b>M</b> <b>E</b> <b>S</b> <b>L</b> <b>K</b> <b>S</b> <b>V</b> <b>G</b> <b>L</b> <b>C</b> <b>W</b> <b>K</b> <b>E</b> <b>G</b> <b>L</b> <b>P</b> <b>C</b> <b>I</b> <b>I</b> <b>F</b> <b>P</b> <b>C</b> <b>C</b> <b>P</b> <b>G</b> <b>L</b> <b>T</b> <b>C</b> <b>G</b> <b>D</b> <b>G</b> <b>I</b> <b>I</b> <b>G</b> <b>D</b> <b>T</b> <b>C</b> <b>Q</b> <b>S</b><br><b>S</b> | Y | 0 | ✓ |
| FRI_104_T  | 2  | <b>G</b> <b>C</b> <b>C</b> <b>P</b> <b>D</b> <b>I</b> <b>A</b> <b>M</b> <b>C</b> <b>C</b> <b>V</b> <b>G</b> <b>I</b>                                                                                                                                                                                                                                                                         | Y | 0 | ✓ |
| FRI_106_V  | 3  | <b>R</b> <b>D</b> <b>C</b> <b>T</b> <b>T</b> <b>C</b> <b>S</b> <b>G</b> <b>E</b> <b>E</b> <b>C</b> <b>C</b> <b>G</b> <b>R</b> <b>C</b> <b>T</b> <b>C</b> <b>T</b> <b>W</b> <b>G</b> <b>D</b> <b>N</b> <b>C</b> <b>D</b> <b>C</b> <b>I</b> <b>A</b> <b>W</b>                                                                                                                                  | Y | 0 | ✓ |

---
