# Supplementary material for: Comparative Venomics of C. flavidus and C. frigidus and Closely Related Vermivorous Cone Snails
Source: MDPI journal article supplement (doi:10.3390/md20030209), 2022-03-15
Supplement: s1 [file s1]

## Supplementary Figures

# Comparative venomomics of *C. flavidus* and *C. frigidus* and closely related vermivorous cone snails.

Himaya S.W.A.<sup>1,\*</sup>, Alexander Arkhipov<sup>1,2</sup>, Wai Ying Yum<sup>1</sup> and Richard J. Lewis<sup>1,\*</sup>

<sup>1</sup> Institute for Molecular Bioscience, The University of Queensland, St Lucia, QLD 4072, Brisbane, Australia

<sup>2</sup> Current address - School of Agriculture and Food Science, The University of Queensland, St Lucia, QLD 4072, Brisbane, Australia

\* Correspondence to: R.J.L. [r.lewis@uq.edu.au](mailto:r.lewis@uq.edu.au); Tel.: +61 7 334 62984; H.S.W.A. [h.sddhihalu@imb.uq.edu.au](mailto:h.sddhihalu@imb.uq.edu.au); Tel.: +61 7 334 62722

|                     | 1                                                      | 10 | 20 | 30 | 40 | 50 | 60 | 70 | 81 |   |   |   |   |   |   |   |   |   |   |   |   |    |   |   |   |   |   |   |   |   |   |   |   |   |   |   |   |   |       |   |   |   |   |   |   |   |   |   |   |   |   |   |   |   |   |   |   |   |   |   |   |   |   |   |   |   |       |   |   |   |   |   |   |   |   |   |   |
|---------------------|--------------------------------------------------------|----|----|----|----|----|----|----|----|---|---|---|---|---|---|---|---|---|---|---|---|----|---|---|---|---|---|---|---|---|---|---|---|---|---|---|---|---|-------|---|---|---|---|---|---|---|---|---|---|---|---|---|---|---|---|---|---|---|---|---|---|---|---|---|---|---|-------|---|---|---|---|---|---|---|---|---|---|
|                     | -----+-----+-----+-----+-----+-----+-----+-----+-----+ |    |    |    |    |    |    |    |    |   |   |   |   |   |   |   |   |   |   |   |   |    |   |   |   |   |   |   |   |   |   |   |   |   |   |   |   |   |       |   |   |   |   |   |   |   |   |   |   |   |   |   |   |   |   |   |   |   |   |   |   |   |   |   |   |   |       |   |   |   |   |   |   |   |   |   |   |
| FLA_102_NSF1        | M                                                      | K  | I  | G  | L  | I  | C  | L  | L  | L | I | A | F | M | N | G | D | - | G | S | L | G  | N | T | M | H | S | R | K | S | A | G | V | V | A | A | I | K | R     | Y | Q | K | N | F | L | R | R | S | C | N | N | C | P | E | E | P | C | C | Y | G | D | Q | C | M | A | D | P     | G | H | E | P | F | C | G | N |   |   |
| FLA_103_NSF1        | M                                                      | M  | K  | I  | G  | L  | I  | C  | L  | L | L | I | A | F | M | N | G | D | - | G | S | L  | G | N | T | M | H | S | R | K | S | A | G | V | V | A | A | I | K     | R | F | Q | K | N | F | L | R | R | T | C | T | N | C | P | E | E | P | C | C | Y | G | D | Q | C | M | P | D     | P | G | H | E | P | F | C | G | N |   |
| FLA_104-FRI_54_NSF1 | M                                                      | M  | K  | I  | S  | L  | I  | C  | L  | L | L | I | A | F | M | N | G | D | - | G | S | L  | G | N | T | M | H | S | R | K | S | A | G | V | V | A | A | I | K     | R | F | Q | K | N | F | L | R | R | T | C | T | N | C | P | E | E | P | C | C | Y | G | D | Q | C | M | P | D     | P | G | H | E | P | F | C | G | N |   |
| FLA_105_NSF2        | M                                                      | R  | V  | Y  | L  | L  | T  | V  | T  | L | L | T | S | F | T | G | A | D | A | G | P | M  | P | A | N | G | H | F | Y | R | R | D | C | Q | M | G | C | V | -     | - | - | - | - | G | C | H | N | R | A | G | C | C | G | D | Q | V | C | V | D | N | N | R | C | E | P | R | P     | S | Q | T |   |   |   |   |   |   |   |
| FLA_106-FRI_56_NSF2 | M                                                      | R  | V  | Y  | L  | L  | T  | V  | T  | L | L | T | S | F | T | G | A | D | A | G | P | M  | P | A | N | G | H | F | Y | R | R | D | C | Q | M | G | C | V | -     | - | - | - | - | G | C | R | N | R | A | G | C | C | G | D | Q | V | C | V | D | N | N | R | C | E | R | R | P     | S | Q | T |   |   |   |   |   |   |   |
| FLA_107_NSF2        | M                                                      | R  | V  | Y  | L  | L  | T  | V  | T  | L | L | T | S | F | T | G | A | D | A | G | P | M  | P | A | N | G | H | F | Y | R | R | D | C | Q | M | G | C | V | -     | - | - | - | - | G | C | R | N | R | A | G | C | C | G | D | Q | V | C | V | D | N | N | R | C | E | S | R | S     | S | Q | T | T | R | P | T | Q | H | L |
| Consensus           | m                                                      | r  | v  | y  | l  | l  | t  | !  | t  | l | l | t | s | f | t | g | a | d | a | g | p | \$ | p | a | n | g | h | f | v | r | r | d | c | q | m | g | c | ! | ..... | g | c | . | n | R | a | g | c | c | g | # | # | v | c | v | d | n | # | r | c | e | . | r | p | s | q | t | ..... |   |   |   |   |   |   |   |   |   |   |

Figure S1: Sequence alignment of the New Superfamily 1 (NSF1) and 2 (NSF2) precursors

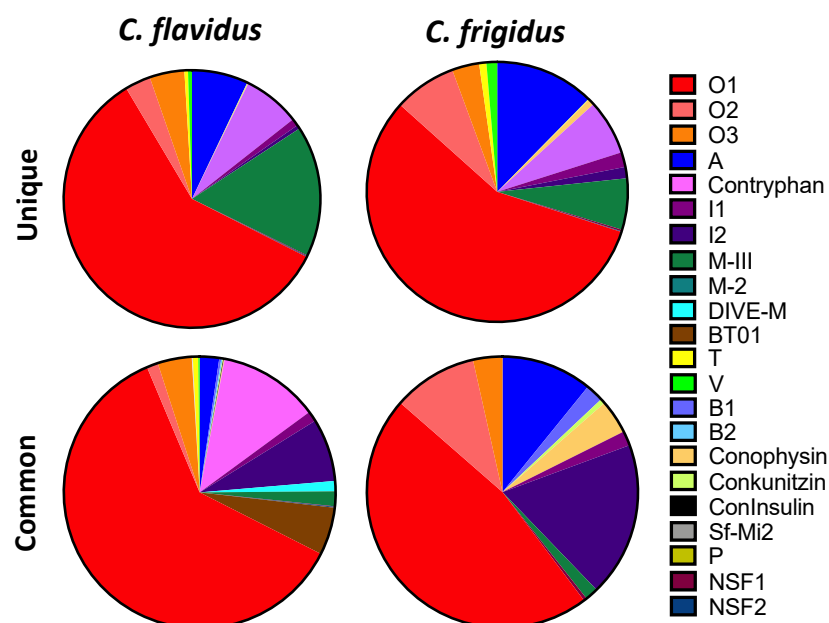

**Figure S2:** The superfamily expression profile of the unique (only found in one species) and common (found in both species) sequences in *C. flavidus* and *C. frigidus* transcriptomes.

O1 conotoxin Sub-Group 1

O1 conotoxin Sub-Group 2

O1 conotoxin Sub-Group 3

Known Toxins

|                | 1    | 10   | 20    | 30     | 40        | 50 | 60 | 70 | 80 | 90 | 93 |
|----------------|------|------|-------|--------|-----------|----|----|----|----|----|----|
| FLA_116-FRI_75 | MKLT | CVLI | ISVFL | LAASQL | STADYPRDN |    |    |    |    |    |    |
| FLA_117-FRI_74 | MKLT | CVLI | ITVFL | LAASQL | ITADFSIDN |    |    |    |    |    |    |
| FLA_118        | MKLT | CVLI | ISVFL | LAASQL | ITADYTKDN |    |    |    |    |    |    |
| FLA_127-FRI_59 | MKLT | CVLI | ISVFL | LAASQL | ITADYTKDN |    |    |    |    |    |    |
| FLA_119        | MKLT | CVLI | ISVFL | LAASQL | ITADYTRDN |    |    |    |    |    |    |
| FLA_137        | MKLT | CVLI | ISVFL | LAASQL | ITADHSRDN |    |    |    |    |    |    |
| FLA_123        | MKLT | CVLI | ISVFL | LAASQL | ITADYTKDN |    |    |    |    |    |    |
| FLA_126-FRI_67 | MKLT | CVLI | ISVFL | LAASQL | ITADYTKDN |    |    |    |    |    |    |
| FLA_124        | MKLT | CVLI | ISVFL | LAASQL | ITADYTKDN |    |    |    |    |    |    |
| FLA_125        | MKLT | CVLI | ISVFL | LAASQL | ITADYTKDN |    |    |    |    |    |    |
| FLA_134        | MKLT | CVLI | ISVFL | LAASQL | ITADYSRDN |    |    |    |    |    |    |
| FLA_135        | MKLT | CVLI | ISVFL | LAASQL | ITADHSRDN |    |    |    |    |    |    |
| FLA_138        | MKLT | CVLI | ISVFL | LAASQL | ITADYSRDN |    |    |    |    |    |    |
| FLA_139-FRI_61 | MKLT | CVLI | ISVFL | LAASQL | ITADYPRDN |    |    |    |    |    |    |
| FRI_63         | MKLT | CVLI | ISVFL | LAASQL | ITADYPRDN |    |    |    |    |    |    |
| FLA_140-FRI_66 | MKLT | CVLI | ISVFL | LAASQL | ITADYTRDN |    |    |    |    |    |    |
| FLA_136        | MKLT | CVLI | ISVFL | LAASQL | ITADYSRDN |    |    |    |    |    |    |
| FLA_129        | MKLT | CVLI | ISVFL | LAASQL | ITADYTKDN |    |    |    |    |    |    |
| FLA_145-FRI_64 | MKLT | CVLI | ISVFL | LAASQL | ITADYTKDN |    |    |    |    |    |    |
| FLA_146-FRI_60 | MKLT | CVLI | ISVFL | LAASQL | ITADYTKDN |    |    |    |    |    |    |
| FRI_70         | MKLT | CVLI | ISVFL | LAASQL | ITADYTKDN |    |    |    |    |    |    |
| FLA_130-FRI_69 | MKLT | CVLI | ISVFL | LAASQL | ITADYPRDN |    |    |    |    |    |    |
| FLA_156-FRI_71 | MKLT | CVLI | ISVFL | LAASQL | ITADYPRDN |    |    |    |    |    |    |
| FRI_68         | MKLT | CVLI | ISVFL | LAASQL | ITADYPRDN |    |    |    |    |    |    |
| FLA_133-FRI_62 | MKLT | CVLI | ISVFL | LAASQL | ITADYPRDN |    |    |    |    |    |    |
| FLA_141        | MKLT | CVLI | ISVFL | LAASQL | ITADYSRDN |    |    |    |    |    |    |
| FLA_142        | MKLT | CVLI | ISVFL | LAASQL | ITADYSRDN |    |    |    |    |    |    |
| FLA_143        | MKLT | CVLI | ISVFL | LAASQL | ITADYSRDN |    |    |    |    |    |    |
| FLA_131        | MKLT | CVLI | ISVFL | LAASQL | ITADYSRDN |    |    |    |    |    |    |
| FLA_132        | MKLT | CVLI | ISVFL | LAASQL | ITADYSRDN |    |    |    |    |    |    |
| FLA_155-FRI_65 | MKLT | CVLI | ISVFL | LAASQL | ITADYTKDN |    |    |    |    |    |    |
| FLA_120        | MKLT | CVLI | ISVFL | LAASQL | ITADFSRDK |    |    |    |    |    |    |
| FLA_122        | MKLT | CVLI | ISVFL | LAASQL | ITADFSRDK |    |    |    |    |    |    |
| FLA_121        | MKLT | CVLI | ISVFL | LAASQL | ITADFSRDK |    |    |    |    |    |    |
| FLA_144        | MKLT | CVLI | ISVFL | LAASQL | ITADFSRDK |    |    |    |    |    |    |
| FRI_73         | MKLT | CVLI | ITVFL | LAASQL | ITADYSRDK |    |    |    |    |    |    |
| FLA_128        | MKLT | CVLI | ITVFL | LAASQL | ITADYSRDK |    |    |    |    |    |    |
| FLA_147-FRI_72 | MKLT | CVLI | ITVFL | LAASQL | ITADYSRDK |    |    |    |    |    |    |
| FRI_76         | MKLT | CVLI | ITVFL | LAASQL | ITADFSRDK |    |    |    |    |    |    |
| FLA_157        | MKLT | CVLI | ITVFL | LAASQL | ITADYSRDK |    |    |    |    |    |    |
| FLA_158        | MKLT | CVLI | ITVFL | LAASQL | ITADYSRDK |    |    |    |    |    |    |
| FLA_159        | MKLT | CVLI | ITVFL | LAASQL | ITADYSRDN |    |    |    |    |    |    |
| FRI_82         | MKLT | CVLI | ITVFL | LAASQL | ITADYSRDN |    |    |    |    |    |    |
| FLA_148        | MKLT | CVLI | ITVFL | LAASQL | ITADYSRDK |    |    |    |    |    |    |
| FLA_149        | MKLT | CVLI | ITVFL | LAASQL | ITADYSRDK |    |    |    |    |    |    |
| FLA_151        | MKLT | CVLI | ITVFL | LAASQL | ITADYSRDK |    |    |    |    |    |    |
| FLA_153-FRI_78 | MKLT | CVLI | ITVFL | LAASQL | ITADYSRDK |    |    |    |    |    |    |
| FLA_154-FRI_79 | MKLT | CVLI | ITVFL | LAASQL | ITADYSRDK |    |    |    |    |    |    |
| FRI_77         | MKLT | CVLI | ITVFL | LAASQL | ITADYSRDK |    |    |    |    |    |    |
| FLA_150        | MKLT | CVLI | ITVFL | LAASQL | ITADYSRDK |    |    |    |    |    |    |
| FLA_152        | MKLT | CVLI | ITVFL | LAASQL | ITADYSRDK |    |    |    |    |    |    |
| FRI_81         | MKLT | CVLI | ITVFL | LAASQL | ITADYSRDK |    |    |    |    |    |    |
| FRI_80         | MKLT | CVLI | ITVFL | LAASQL | ITADYSRDK |    |    |    |    |    |    |
| FRI_57         | MKLT | CVLI | ITVFL | LAASQL | ITADYSRDK |    |    |    |    |    |    |
| FRI_58         | MKLT | CVLI | ITVFL | LAASQL | ITADYSRDK |    |    |    |    |    |    |
| PnVIA          | MKLT | CVLI | ITVFL | LAASQL | ITADYSRDK |    |    |    |    |    |    |
| TxVIA          | MKLT | CVLI | ITVFL | LAASQL | ITADYSRDK |    |    |    |    |    |    |
| TxVIA          | MKLT | CVLI | ITVFL | LAASQL | ITADYSRDK |    |    |    |    |    |    |
| PVIA           | MKLT | CVLI | ITVFL | LAASQL | ITADYSRDK |    |    |    |    |    |    |
| MVIA           | MKLT | CVLI | ITVFL | LAASQL | ITADYSRDK |    |    |    |    |    |    |
| MVIA           | MKLT | CVLI | ITVFL | LAASQL | ITADYSRDK |    |    |    |    |    |    |
| CVIA           | MKLT | CVLI | ITVFL | LAASQL | ITADYSRDK |    |    |    |    |    |    |
| GVIA           | MKLT | CVLI | ITVFL | LAASQL | ITADYSRDK |    |    |    |    |    |    |
| TVIA           | MKLT | CVLI | ITVFL | LAASQL | ITADYSRDK |    |    |    |    |    |    |
| MoVIA          | MKLT | CVLI | ITVFL | LAASQL | ITADYSRDK |    |    |    |    |    |    |
| MoVIB          | MKLT | CVLI | ITVFL | LAASQL | ITADYSRDK |    |    |    |    |    |    |
| TsVIA          | MKLT | CVLI | ITVFL | LAASQL | ITADYSRDK |    |    |    |    |    |    |
| SuVIA          | MKLT | CVLI | ITVFL | LAASQL | ITADYSRDK |    |    |    |    |    |    |
| Consensus      | MKLT | CVLI | ISVFL | LAASQL | ITADYSRDK |    |    |    |    |    |    |

**Figure S3** : Alignment of O1 conotoxin precursors found in *C. flavidus* and *C. frigidus* transcriptomes. The precursor sequences were classified into three subgroups based on the sequence similarity. Known O1 superfamily  $\omega$ - and  $\delta$ -conotoxins from fish, mollusk and worm hunting cone snails were aligned with the *C. flavidus* and *C. frigidus* O1 precursors using Clustal Omega. Conserved amino acids are highlighted and the consensus sequence shown at the bottom.

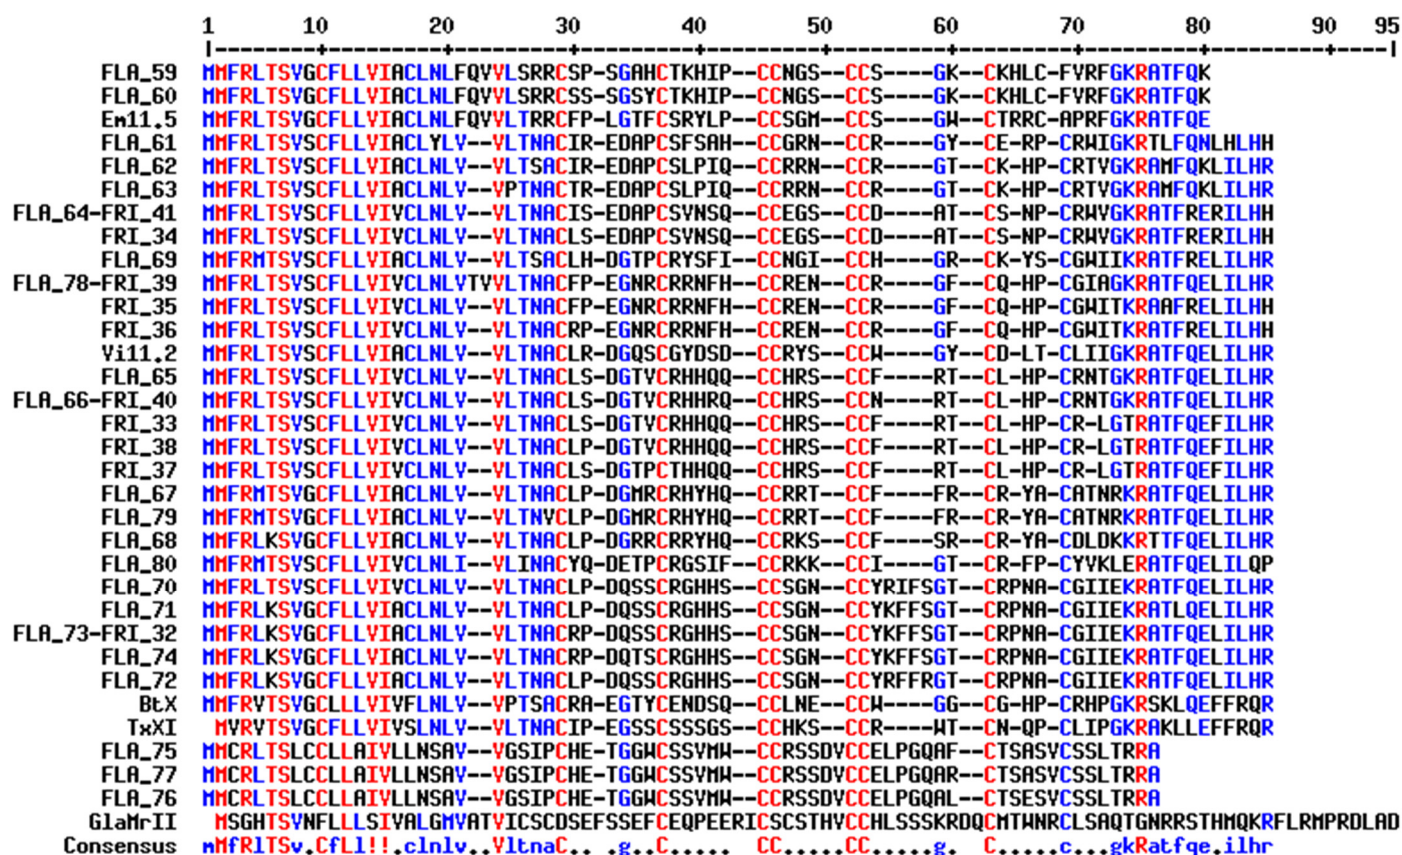

**Figure S4** : 12 conotoxin precursors aligned with known 12 conotoxin precursors from other Cone snails (Vi11.2, Btx, TxxI and GlaMrII).

|               | 1                     | 10 | 2022 |
|---------------|-----------------------|----|------|
|               | -----+-----+-----     |    |      |
| FLA_01        | DCCNDPACAVNHQDLCT     |    |      |
| FLA_02-FRI_01 | DCCNDPACAVNNPGLCT     |    |      |
| FLA_03        | DCCNDPACTVNNPGLCT     |    |      |
| FRI_02        | DCCNLPACAASNPGLCT     |    |      |
| FRI_03        | DCCNFPACAASNPGLCT     |    |      |
| Vc1.1         | GCCSDPRCNYDHPEIC      |    |      |
| PeIA          | GCCSHPACSVNHPELC      |    |      |
| LvIA          | GCCSHPACNVDHPEIC      |    |      |
| LsIA          | SGCCSNPACRYNNPNIC     |    |      |
| TxIA          | GCCSRPPCIANNPDLC      |    |      |
| GIC           | GCCSHPACAGNNQHIC      |    |      |
| FLA_04-FRI_04 | DCCSSAACAHHTPSC       |    |      |
| FLA_05        | DCCSSVACAHHTPSC       |    |      |
| FLA_07-FRI_14 | GCCSDPPCAHHNPAC       |    |      |
| FRI_08        | GCCSDPPCAHHNPSC       |    |      |
| FLA_13        | GCCSNPPCAHHNPAC       |    |      |
| FRI_11        | GCCSNPPCAHHNPDC       |    |      |
| FRI_13        | GCCSDPPCAHHNPDC       |    |      |
| FLA_10        | GCCSDPPCAHHNPAC       |    |      |
| FLA_12        | GCCSDPPCARHNPAC       |    |      |
| FLA_11-FRI_05 | GCCSDPPCAHHNPDC       |    |      |
| FLA_16-FRI_12 | GCCSNPPCAHHNPDC       |    |      |
| FLA_19-FRI_06 | DCCSDPPCAHHNPDC       |    |      |
| ViIA          | RDCCSNPPCAHHNPDCR     |    |      |
| FRI_10        | DCCSDSPCAHHNPDC       |    |      |
| FLA_14        | GCCSNPPCAHINPDC       |    |      |
| FLA_15        | GCCSNPPCAHLNPAC       |    |      |
| FLA_17        | GCCSNPPCALNPNDC       |    |      |
| FLA_18        | GCCSSPPCARLNPAC       |    |      |
| FLA_06        | GCCSDP-CAHKHC         |    |      |
| FLA_08-FRI_09 | GCCSDPPCAHKHC         |    |      |
| FLA_09-FRI_07 | GCCSDPPCAHKYC         |    |      |
| RgIA          | GCCSDPRCRYRCR         |    |      |
| ImI           | GCCSDPRCAWRC          |    |      |
| P1169         | TVIMHNCCTRSFCRIYPDLCS |    |      |
| P1170         | GIGGSCCVIRSCAIKFSTLCG |    |      |
| SI            | ICCNPACGPKYSC         |    |      |
| MI            | GRCCHPACGKNYSC        |    |      |
| CIA           | NGRCCHPACGKHFSC       |    |      |
| Consensus     | .gcCs.p.Ca..np....    |    |      |

**Figure S5:** A conotoxins aligned with known A conotoxins from other fish (SI, MI, CIA, GIC), mollusk (TxIA) and worm hunters (PeIA, LvIA, LsIA, ViIA, RgIA, ImI, P1169, P1170).

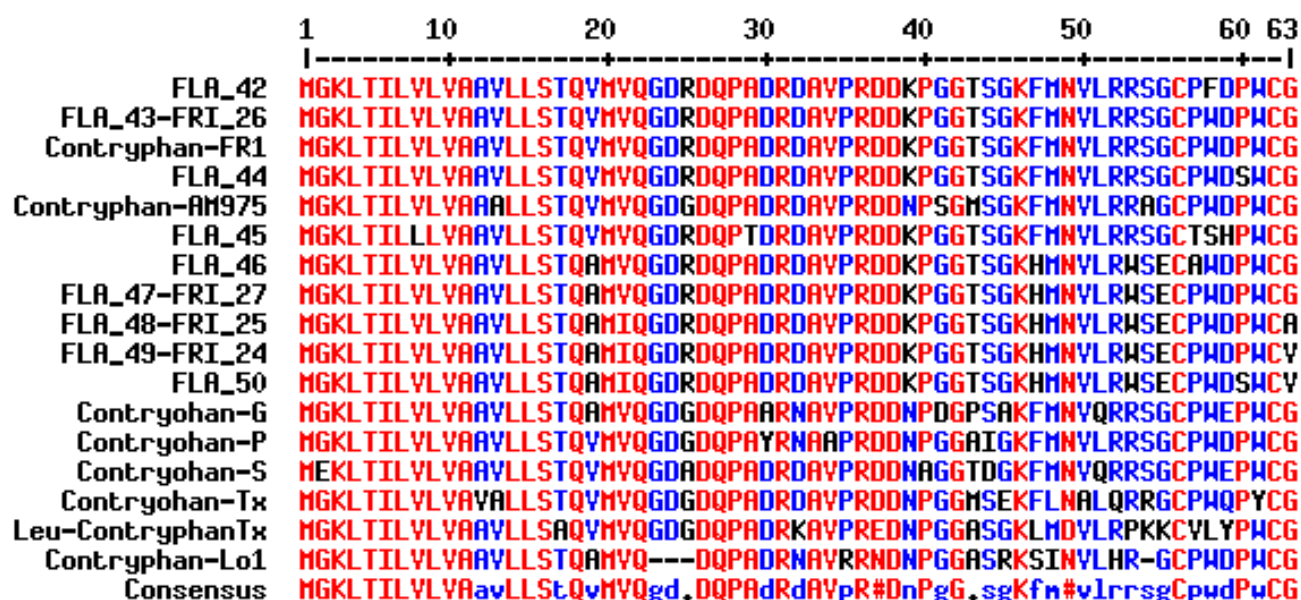

**Figure S6:** Contryphan precursors aligned with known Contryphan precursors from other fish (Contryphan-G, Contryphan-S Contryphan-P), mollusk (Contryphan-Tx, Leu-Contryphan-Tx) and worm (Contryphan-Lo1) hunters.



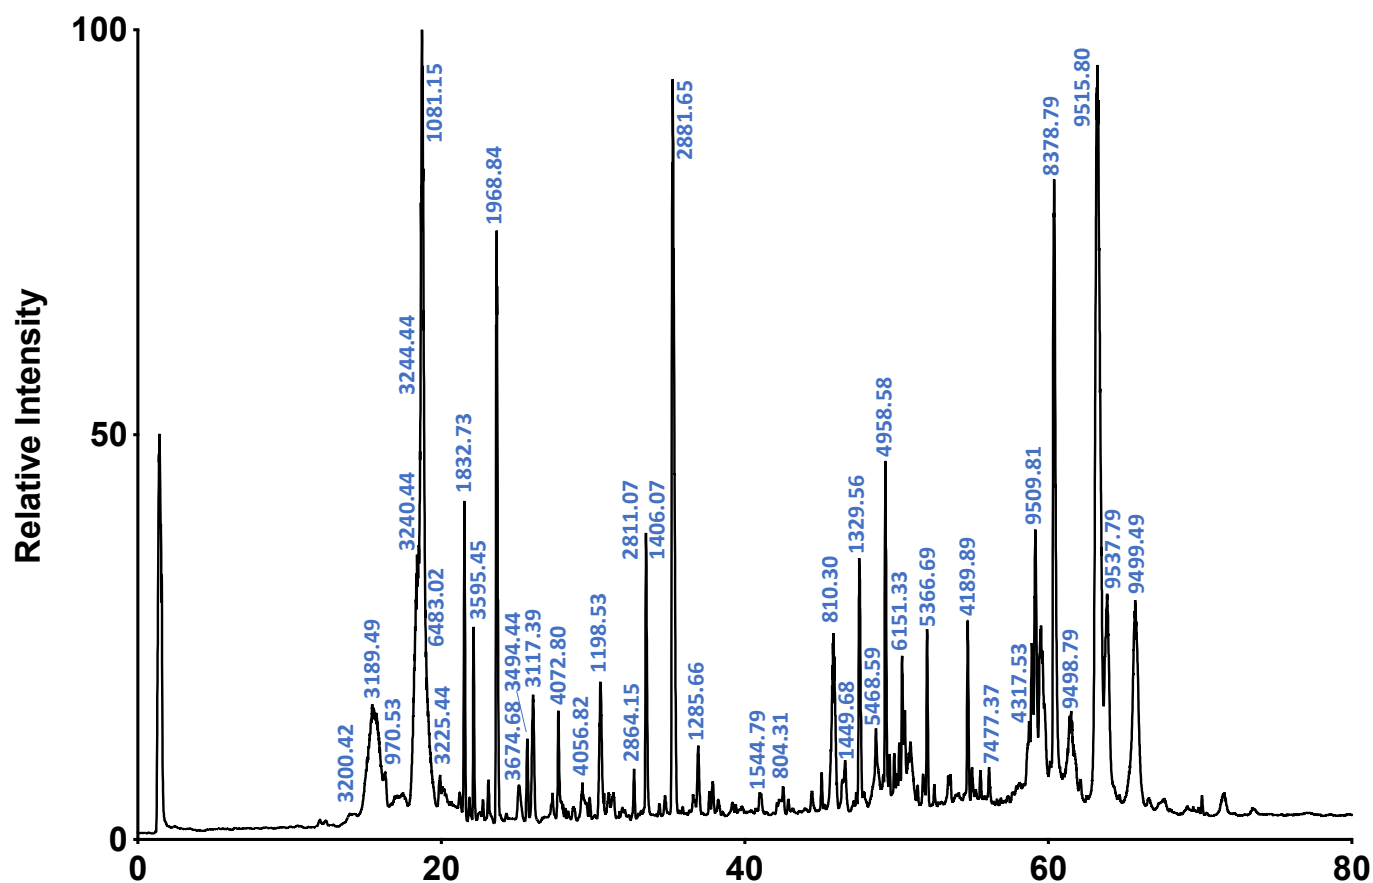

Figure S7: TIC of the *C. flavidus* Proximal venom duct showing dominant masses eluting under major peaks.



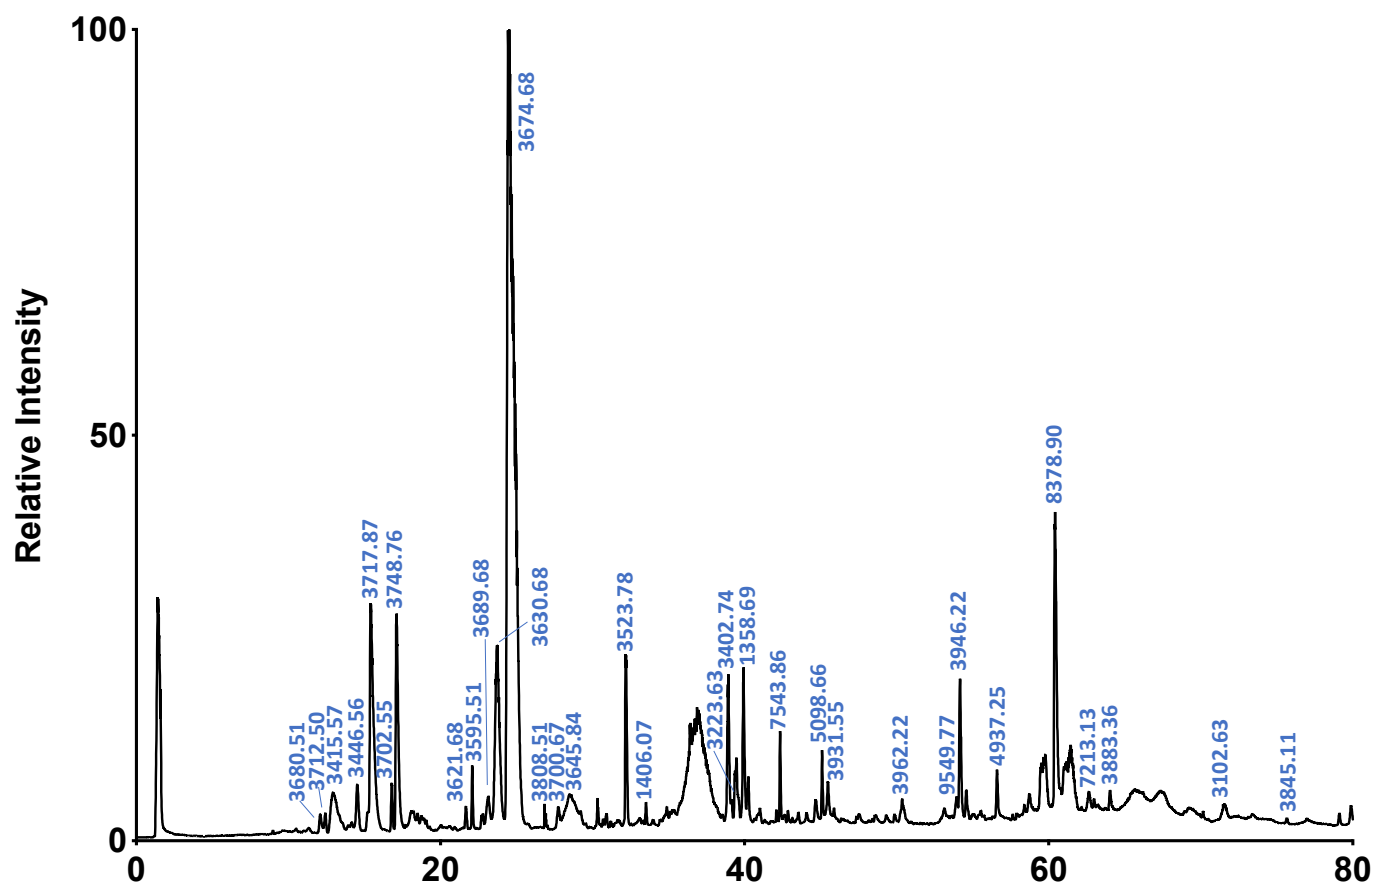

Figure S8: TIC of the *C. flavidus* Distal venom duct showing dominant masses eluting under major peaks.

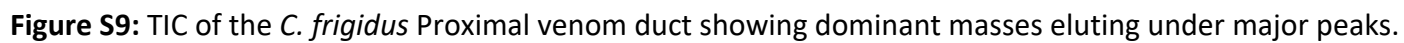

**Figure S9:** TIC of the *C. frigidus* Proximal venom duct showing dominant masses eluting under major peaks.

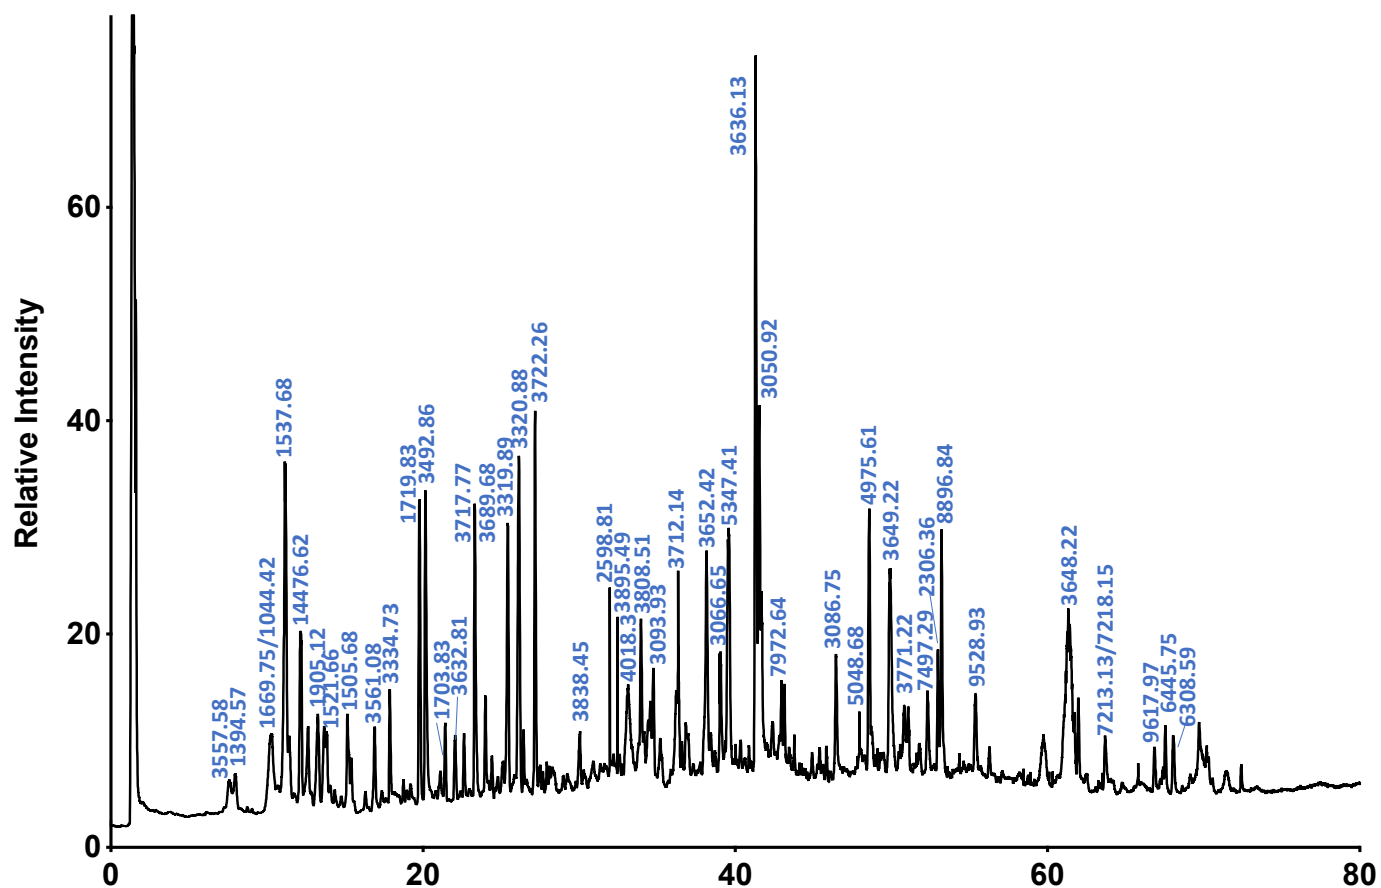

**Figure S10:** TIC of the *C. frigidus* Distal venom duct showing dominant masses eluting under major peaks.

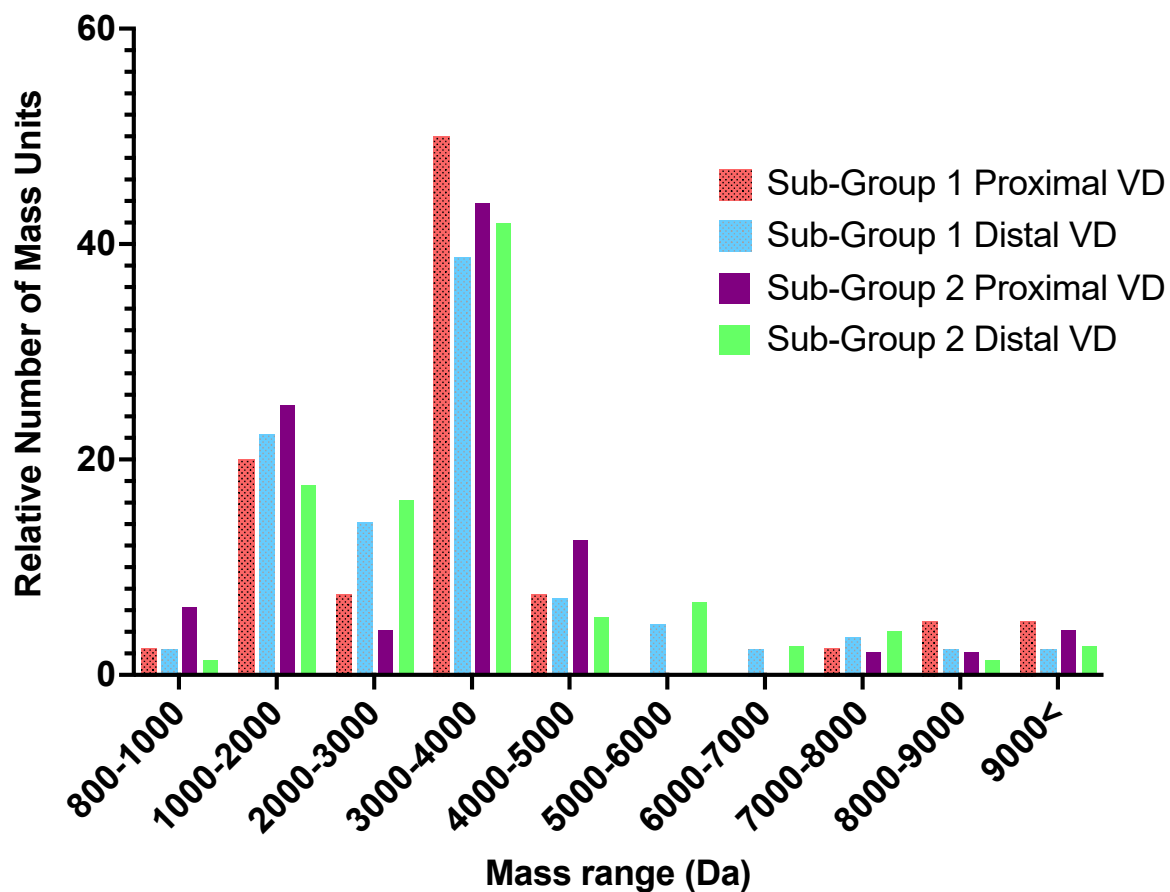

**Figure S11:** Mass distribution ranges in the reconstructed major masses of proximal and distal venom duct extracts of sub-groups 1 and 2.

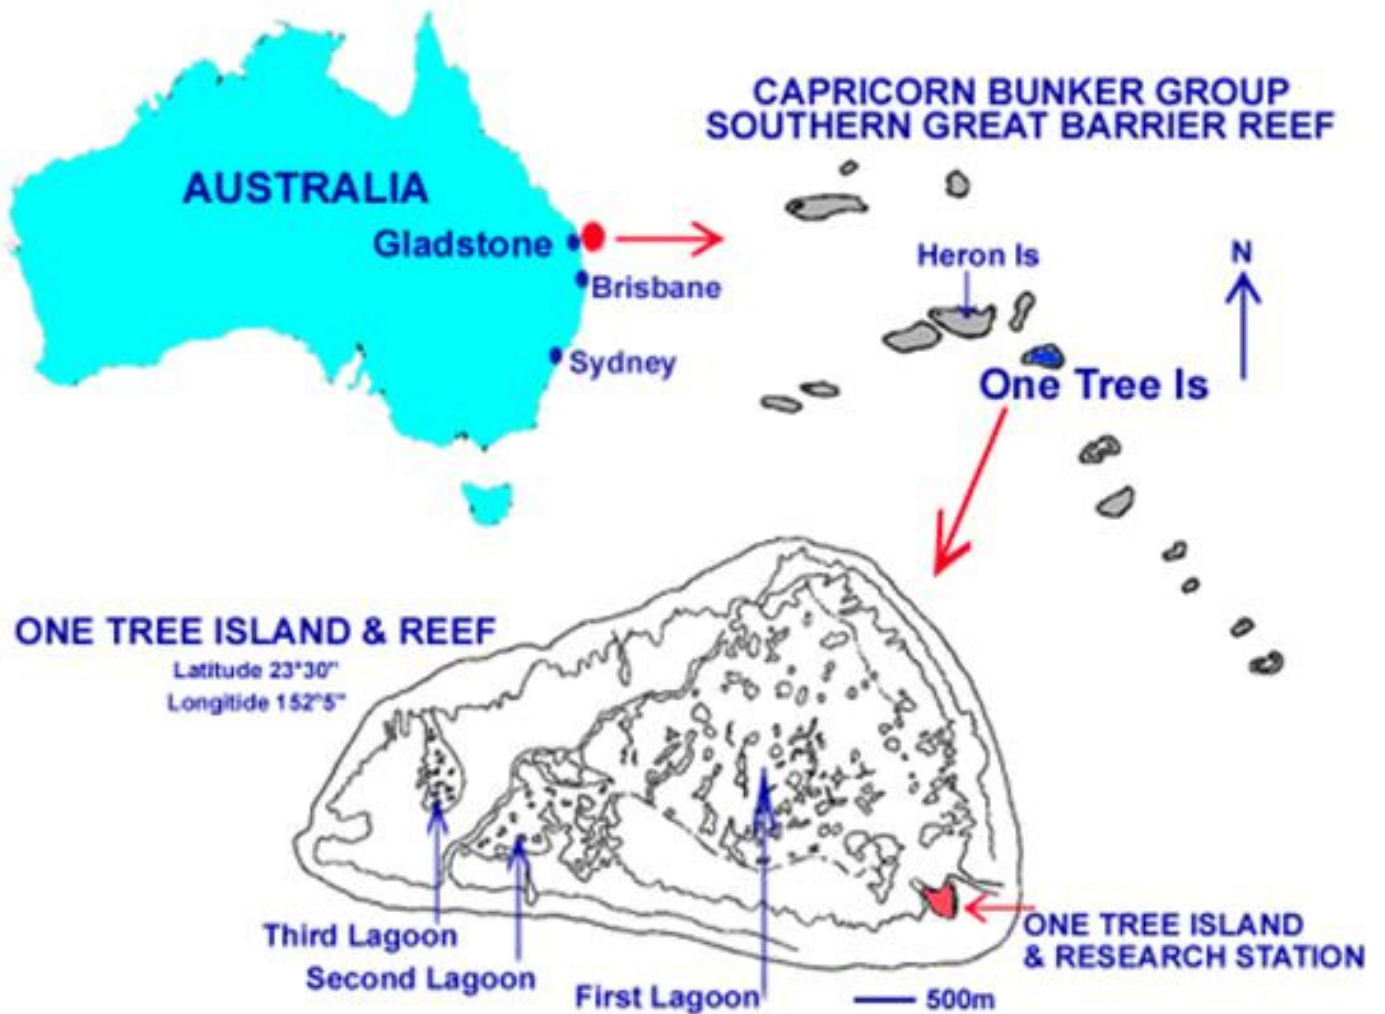

**Figure S12.** One Tree Island Map. The map is taken from the One Tree Island Research Station resources.
